# Supplementary material
Source: bioRxiv or medRxiv preprint supplement (https://medrxiv.org/highwire/filestream/91329/field_highwire_adjunct_files/0/2020.07.27.20156836-1.pdf)
Supplement: Supplementary file [file 2020.07.27.20156836-1.pdf]

# Modeling the initial phase of SARS-CoV-2 deposition in the respiratory tract mimicked by the $^{11}\text{C}$ radionuclide

Heitor Evangelista<sup>1</sup>, Cesar Amaral<sup>1</sup>, Luís Cristóvão Porto<sup>2</sup>, Sergio J. Gonçalves Junior<sup>1</sup>, Eduardo Delfino Sodr <sup>1</sup>, Juliana Nogueira<sup>1</sup>, Angela M.G. dos Santos<sup>2</sup>, Marcio Cataldo<sup>3</sup>

<sup>1</sup> LARAMG - Laboratory of Radioecology and Global Changes/DBB/IBRAG. UERJ, Pavilh o Haroldo L. Cunha/DBB/IBRAG. Rua S o Francisco Xavier 524. Maracan , Rio de Janeiro State University, Rio de Janeiro, RJ, 20550-013. Brazil.

<sup>2</sup> Piquet Carneiro Polyclinic/Histocompatibility and Cryopreservation Laboratory, Rio de Janeiro State University, Rio de Janeiro State University. Av. Mal. Rondon, 381 - S o Francisco Xavier, Rio de Janeiro, RJ, 20950-003. Brazil.

<sup>3</sup> Draxos Consultoria e Gest o Ambiental Ltda. Av. das Am ricas 7938 - Sala 329, Rio de Janeiro, RJ, 22793-081. Brazil.

**\* Correspondence:**

Heitor Evangelista  
evangelista.uerj@gmail.com

## Abstract

The knowledge on the deposition and retention of the viral particle of SARS-CoV-2 in the respiratory tract during the very initial intake from the ambient air is of prime importance to understand the infectious process and COVID-19 initial symptoms. To give some light on that, we propose to use a modified version of a widely tested lung deposition model developed by the ICRP, in the context of the ICRP Publication 66, that provides deposition patterns of microparticles in different lung compartments. In the model, we mimicked the “environmental decay” of the virus, determined by controlled experiments related to normal speeches, by the radionuclide  $^{11}\text{C}$  that presents comparable decay rates. Our results confirm clinical observations on the high virus retentions observed in the extrathoracic region and the lesser fraction on the alveolar section (in the order of 5), which relevance is a subject to be investigated.

**Keywords:** SARS-CoV-2, COVID-19, respiratory tract, viral load, radionuclides, ICRP-66.

## Supplementary Material

Model: C, Isotope: C-11

Observation: Carbon according with ICRP-67

Subject: Standard Worker (Nose Breather)

Intake: Inhalation, Single

Element: 1 (Series with 1 element(s))

Initial or Daily Activity: 1.00E+00 Bq

Inhalation: Respiratory Tract: ICRP-66

Compound: Type F

GI Tract Absorption Factor: F1 = 1.00E+00

AMAD (um): 5.00E+00

| <i>Time (Min.)</i> | <i>Extrathoracic<br/>1</i> | <i>Extrathoracic<br/>2</i> | <i>LymphNode<br/>Extrathoracic</i> | <i>Bronchial</i> | <i>Bronchiolar</i> |
|--------------------|----------------------------|----------------------------|------------------------------------|------------------|--------------------|
| 0.08               | 0.338                      | 0.394                      | 1.1E-11                            | 0.0176           | 0.0109             |
| 0.16               | 0.337                      | 0.388                      | 2.18E-11                           | 0.0175           | 0.0108             |
| 0.24               | 0.336                      | 0.383                      | 3.24E-11                           | 0.0173           | 0.0108             |
| 0.32               | 0.335                      | 0.378                      | 4.29E-11                           | 0.0172           | 0.0107             |
| 0.4                | 0.334                      | 0.372                      | 5.32E-11                           | 0.017            | 0.0106             |
| 0.48               | 0.333                      | 0.367                      | 6.33E-11                           | 0.0169           | 0.0105             |
| 0.56               | 0.332                      | 0.362                      | 7.32E-11                           | 0.0167           | 0.0104             |
| 0.64               | 0.331                      | 0.357                      | 8.3E-11                            | 0.0166           | 0.0103             |
| 0.72               | 0.33                       | 0.352                      | 9.26E-11                           | 0.0164           | 0.0102             |
| 1                  | 0.327                      | 0.336                      | 1.25E-10                           | 0.0159           | 0.00994            |
| 2                  | 0.316                      | 0.283                      | 2.25E-10                           | 0.0143           | 0.00895            |
| 3                  | 0.305                      | 0.238                      | 3.05E-10                           | 0.0129           | 0.00807            |
| 4                  | 0.295                      | 0.2                        | 3.66E-10                           | 0.0116           | 0.00727            |
| 5                  | 0.285                      | 0.168                      | 4.13E-10                           | 0.0104           | 0.00655            |
| 6                  | 0.275                      | 0.142                      | 4.47E-10                           | 0.00932          | 0.0059             |
| 7                  | 0.265                      | 0.119                      | 4.7E-10                            | 0.00837          | 0.00532            |
| 8                  | 0.256                      | 0.1                        | 4.85E-10                           | 0.00752          | 0.00479            |
| 9                  | 0.248                      | 0.0844                     | 4.92E-10                           | 0.00675          | 0.00432            |
| 10                 | 0.239                      | 0.0711                     | 4.92E-10                           | 0.00606          | 0.00389            |
| 12                 | 0.223                      | 0.0503                     | 4.81E-10                           | 0.00489          | 0.00316            |
| 14                 | 0.208                      | 0.0357                     | 4.56E-10                           | 0.00395          | 0.00256            |
| 16                 | 0.194                      | 0.0253                     | 4.24E-10                           | 0.00318          | 0.00208            |
| 18                 | 0.181                      | 0.0179                     | 3.87E-10                           | 0.00257          | 0.00169            |
| 20                 | 0.169                      | 0.0127                     | 3.5E-10                            | 0.00207          | 0.00137            |
| 22                 | 0.158                      | 0.00904                    | 3.13E-10                           | 0.00167          | 0.00111            |
| 24                 | 0.147                      | 0.00643                    | 2.78E-10                           | 0.00135          | 0.000903           |
| 26                 | 0.137                      | 0.00458                    | 2.44E-10                           | 0.00109          | 0.000733           |
| 28                 | 0.128                      | 0.00325                    | 2.14E-10                           | 0.000879         | 0.000595           |
| 30                 | 0.12                       | 0.00231                    | 1.86E-10                           | 0.000709         | 0.000483           |
| 32                 | 0.111                      | 0.00165                    | 1.62E-10                           | 0.000572         | 0.000392           |

|     |         |          |          |          |          |
|-----|---------|----------|----------|----------|----------|
| 34  | 0.104   | 0.00117  | 1.4E-10  | 0.000462 | 0.000319 |
| 36  | 0.097   | 0.000837 | 1.2E-10  | 0.000373 | 0.000259 |
| 38  | 0.0905  | 0.000598 | 1.03E-10 | 0.000301 | 0.00021  |
| 40  | 0.0845  | 0.000426 | 8.84E-11 | 0.000243 | 0.000171 |
| 42  | 0.0788  | 0.000304 | 7.54E-11 | 0.000196 | 0.000138 |
| 44  | 0.0735  | 0.000216 | 6.43E-11 | 0.000158 | 0.000112 |
| 46  | 0.0686  | 0.000155 | 5.46E-11 | 0.000128 | 9.12E-05 |
| 48  | 0.064   | 0.000111 | 4.64E-11 | 0.000103 | 7.41E-05 |
| 50  | 0.0597  | 7.95E-05 | 3.93E-11 | 8.34E-05 | 6.01E-05 |
| 52  | 0.0557  | 5.68E-05 | 3.32E-11 | 6.73E-05 | 4.88E-05 |
| 54  | 0.052   | 4.05E-05 | 2.8E-11  | 5.44E-05 | 3.96E-05 |
| 56  | 0.0485  | 2.91E-05 | 2.36E-11 | 4.39E-05 | 3.22E-05 |
| 58  | 0.0452  | 2.11E-05 | 1.99E-11 | 3.54E-05 | 2.61E-05 |
| 60  | 0.0422  | 1.52E-05 | 1.67E-11 | 2.86E-05 | 2.12E-05 |
| 62  | 0.0394  | 1.09E-05 | 1.41E-11 | 2.31E-05 | 1.72E-05 |
| 64  | 0.0367  | 7.87E-06 | 1.18E-11 | 1.87E-05 | 0.000014 |
| 66  | 0.0343  | 5.76E-06 | 9.91E-12 | 1.51E-05 | 1.13E-05 |
| 68  | 0.032   | 4.19E-06 | 8.3E-12  | 1.22E-05 | 9.21E-06 |
| 70  | 0.0298  | 3.03E-06 | 6.95E-12 | 9.84E-06 | 7.48E-06 |
| 72  | 0.0278  | 2.23E-06 | 5.81E-12 | 7.95E-06 | 6.07E-06 |
| 74  | 0.026   | 1.65E-06 | 4.86E-12 | 6.42E-06 | 4.93E-06 |
| 76  | 0.0242  | 1.21E-06 | 4.05E-12 | 5.19E-06 | 0.000004 |
| 78  | 0.0226  | 8.88E-07 | 3.38E-12 | 4.19E-06 | 3.25E-06 |
| 80  | 0.0211  | 6.64E-07 | 2.82E-12 | 3.38E-06 | 2.64E-06 |
| 82  | 0.0197  | 4.94E-07 | 2.35E-12 | 2.73E-06 | 2.14E-06 |
| 84  | 0.0183  | 3.7E-07  | 1.96E-12 | 2.21E-06 | 1.74E-06 |
| 86  | 0.0171  | 2.78E-07 | 1.63E-12 | 1.79E-06 | 1.41E-06 |
| 88  | 0.016   | 2.1E-07  | 1.36E-12 | 1.44E-06 | 1.15E-06 |
| 90  | 0.0149  | 1.59E-07 | 1.13E-12 | 1.17E-06 | 9.3E-07  |
| 92  | 0.0139  | 1.21E-07 | 9.38E-13 | 9.43E-07 | 7.56E-07 |
| 94  | 0.013   | 9.28E-08 | 7.8E-13  | 7.62E-07 | 6.14E-07 |
| 96  | 0.0121  | 7.14E-08 | 6.48E-13 | 6.17E-07 | 4.99E-07 |
| 98  | 0.0113  | 5.51E-08 | 5.38E-13 | 4.99E-07 | 4.05E-07 |
| 100 | 0.0105  | 4.27E-08 | 4.47E-13 | 4.03E-07 | 3.29E-07 |
| 102 | 0.00982 | 3.32E-08 | 3.7E-13  | 3.26E-07 | 2.67E-07 |
| 104 | 0.00916 | 2.59E-08 | 3.07E-13 | 2.64E-07 | 2.17E-07 |
| 106 | 0.00855 | 2.02E-08 | 2.55E-13 | 2.14E-07 | 1.76E-07 |
| 108 | 0.00798 | 1.58E-08 | 2.11E-13 | 1.73E-07 | 1.43E-07 |
| 110 | 0.00744 | 1.24E-08 | 1.75E-13 | 1.4E-07  | 1.16E-07 |
| 112 | 0.00694 | 9.73E-09 | 1.45E-13 | 1.13E-07 | 9.43E-08 |
| 114 | 0.00648 | 7.66E-09 | 1.2E-13  | 9.1E-08  | 7.65E-08 |
| 116 | 0.00604 | 6.05E-09 | 9.9E-14  | 7.36E-08 | 6.21E-08 |
| 118 | 0.00564 | 4.8E-09  | 8.19E-14 | 5.95E-08 | 5.04E-08 |
| 120 | 0.00526 | 3.81E-09 | 6.77E-14 | 4.81E-08 | 4.09E-08 |
| 125 | 0.00442 | 2.15E-09 | 4.2E-14  | 2.83E-08 | 2.43E-08 |
| 130 | 0.00372 | 1.22E-09 | 2.6E-14  | 1.66E-08 | 1.44E-08 |

|     |          |          |          |          |          |
|-----|----------|----------|----------|----------|----------|
| 135 | 0.00312  | 6.97E-10 | 1.61E-14 | 9.73E-09 | 8.52E-09 |
| 140 | 0.00263  | 4.02E-10 | 9.94E-15 | 5.71E-09 | 5.05E-09 |
| 145 | 0.00221  | 2.33E-10 | 6.13E-15 | 3.36E-09 | 3E-09    |
| 150 | 0.00186  | 1.36E-10 | 3.79E-15 | 1.98E-09 | 1.79E-09 |
| 155 | 0.00156  | 7.91E-11 | 2.33E-15 | 1.17E-09 | 1.06E-09 |
| 160 | 0.00131  | 4.6E-11  | 1.44E-15 | 6.88E-10 | 6.3E-10  |
| 165 | 0.0011   | 2.7E-11  | 8.83E-16 | 4.07E-10 | 3.75E-10 |
| 170 | 0.000927 | 1.57E-11 | 5.42E-16 | 2.39E-10 | 2.22E-10 |
| 175 | 0.00078  | 9.21E-12 | 3.33E-16 | 1.41E-10 | 1.32E-10 |
| 180 | 0.000655 | 5.36E-12 | 2.04E-16 | 8.32E-11 | 7.84E-11 |
| 185 | 0.000551 | 3.17E-12 | 1.25E-16 | 4.93E-11 | 4.67E-11 |
| 190 | 0.000463 | 1.84E-12 | 7.66E-17 | 2.9E-11  | 2.77E-11 |
| 195 | 0.000389 | 1.08E-12 | 4.69E-17 | 1.71E-11 | 1.65E-11 |
| 200 | 0.000327 | 6.33E-13 | 2.87E-17 | 1.01E-11 | 9.79E-12 |
| 205 | 0.000275 | 3.72E-13 | 1.75E-17 | 5.97E-12 | 5.82E-12 |
| 210 | 0.000231 | 2.17E-13 | 1.07E-17 | 3.53E-12 | 3.45E-12 |
| 215 | 0.000195 | 1.28E-13 | 6.53E-18 | 2.09E-12 | 2.05E-12 |
| 220 | 0.000164 | 7.54E-14 | 3.99E-18 | 1.24E-12 | 1.22E-12 |
| 230 | 0.000116 | 2.59E-14 | 1.48E-18 | 4.31E-13 | 4.32E-13 |
| 240 | 8.17E-05 | 8.87E-15 | 5.5E-19  | 1.5E-13  | 1.52E-13 |
| 250 | 5.77E-05 | 3.1E-15  | 2.03E-19 | 5.26E-14 | 5.37E-14 |
| 300 | 1.02E-05 | 1.28E-17 | 1.22E-21 | 2.36E-16 | 2.51E-16 |
| 350 | 1.79E-06 | -4.6E-20 | 4.67E-25 | -3.5E-19 | -3.2E-19 |

| <i>Time</i> | <i>Alveolar Interstit</i> | <i>Thoracic Lymph Node</i> | <i>Extrathoracic Total.</i> | <i>Thoracic Total</i> | <i>RT-TOTAL</i> |
|-------------|---------------------------|----------------------------|-----------------------------|-----------------------|-----------------|
| 0.08        | 0.0528                    | 1.17E-10                   | 0.731                       | 0.0813                | 0.812           |
| 0.16        | 0.0523                    | 2.32E-10                   | 0.725                       | 0.0806                | 0.805           |
| 0.24        | 0.0519                    | 3.45E-10                   | 0.719                       | 0.08                  | 0.799           |
| 0.32        | 0.0515                    | 4.56E-10                   | 0.712                       | 0.0793                | 0.792           |
| 0.4         | 0.051                     | 5.65E-10                   | 0.706                       | 0.0786                | 0.785           |
| 0.48        | 0.0506                    | 6.73E-10                   | 0.7                         | 0.078                 | 0.778           |
| 0.56        | 0.0502                    | 7.79E-10                   | 0.694                       | 0.0773                | 0.772           |
| 0.64        | 0.0498                    | 8.83E-10                   | 0.688                       | 0.0767                | 0.765           |
| 0.72        | 0.0494                    | 9.85E-10                   | 0.683                       | 0.076                 | 0.759           |
| 1           | 0.048                     | 1.33E-09                   | 0.663                       | 0.0738                | 0.737           |
| 2           | 0.0432                    | 2.4E-09                    | 0.598                       | 0.0665                | 0.665           |
| 3           | 0.039                     | 3.24E-09                   | 0.543                       | 0.0599                | 0.603           |
| 4           | 0.0352                    | 3.9E-09                    | 0.495                       | 0.054                 | 0.549           |
| 5           | 0.0317                    | 4.39E-09                   | 0.453                       | 0.0486                | 0.502           |
| 6           | 0.0286                    | 4.75E-09                   | 0.417                       | 0.0438                | 0.46            |
| 7           | 0.0258                    | 5E-09                      | 0.385                       | 0.0395                | 0.424           |
| 8           | 0.0232                    | 5.15E-09                   | 0.357                       | 0.0356                | 0.392           |
| 9           | 0.021                     | 5.23E-09                   | 0.332                       | 0.032                 | 0.364           |
| 10          | 0.0189                    | 5.24E-09                   | 0.31                        | 0.0289                | 0.339           |
| 12          | 0.0154                    | 5.11E-09                   | 0.274                       | 0.0234                | 0.297           |
| 14          | 0.0125                    | 4.85E-09                   | 0.244                       | 0.019                 | 0.263           |
| 16          | 0.0102                    | 4.5E-09                    | 0.22                        | 0.0154                | 0.235           |
| 18          | 0.00826                   | 4.12E-09                   | 0.199                       | 0.0125                | 0.212           |
| 20          | 0.00672                   | 3.72E-09                   | 0.182                       | 0.0102                | 0.192           |
| 22          | 0.00546                   | 3.33E-09                   | 0.167                       | 0.00825               | 0.175           |
| 24          | 0.00444                   | 2.95E-09                   | 0.154                       | 0.00669               | 0.16            |
| 26          | 0.00361                   | 2.6E-09                    | 0.142                       | 0.00543               | 0.147           |
| 28          | 0.00294                   | 2.28E-09                   | 0.131                       | 0.00441               | 0.136           |
| 30          | 0.00239                   | 1.98E-09                   | 0.122                       | 0.00358               | 0.125           |
| 32          | 0.00194                   | 1.72E-09                   | 0.113                       | 0.00291               | 0.116           |
| 34          | 0.00158                   | 1.49E-09                   | 0.105                       | 0.00236               | 0.108           |

|     |          |          |        |          |        |
|-----|----------|----------|--------|----------|--------|
| 36  | 0.00128  | 1.28E-09 | 0.0979 | 0.00192  | 0.0998 |
| 38  | 0.00104  | 1.1E-09  | 0.0911 | 0.00156  | 0.0927 |
| 40  | 0.000849 | 9.39E-10 | 0.0849 | 0.00126  | 0.0862 |
| 42  | 0.00069  | 8.02E-10 | 0.0791 | 0.00103  | 0.0801 |
| 44  | 0.000561 | 6.83E-10 | 0.0737 | 0.000832 | 0.0746 |
| 46  | 0.000457 | 5.81E-10 | 0.0687 | 0.000676 | 0.0694 |
| 48  | 0.000371 | 4.93E-10 | 0.0641 | 0.000549 | 0.0646 |
| 50  | 0.000302 | 4.17E-10 | 0.0598 | 0.000445 | 0.0602 |
| 52  | 0.000245 | 3.53E-10 | 0.0557 | 0.000362 | 0.0561 |
| 54  | 0.0002   | 2.98E-10 | 0.052  | 0.000294 | 0.0523 |
| 56  | 0.000162 | 2.51E-10 | 0.0485 | 0.000238 | 0.0487 |
| 58  | 0.000132 | 2.12E-10 | 0.0452 | 0.000194 | 0.0454 |
| 60  | 0.000107 | 1.78E-10 | 0.0422 | 0.000157 | 0.0424 |
| 62  | 8.72E-05 | 1.5E-10  | 0.0394 | 0.000128 | 0.0395 |
| 64  | 7.09E-05 | 1.26E-10 | 0.0367 | 0.000104 | 0.0368 |
| 66  | 5.77E-05 | 1.05E-10 | 0.0343 | 8.41E-05 | 0.0343 |
| 68  | 4.69E-05 | 8.82E-11 | 0.032  | 6.83E-05 | 0.032  |
| 70  | 3.81E-05 | 7.38E-11 | 0.0298 | 5.54E-05 | 0.0299 |
| 72  | 0.000031 | 6.18E-11 | 0.0278 | 0.000045 | 0.0279 |
| 74  | 2.52E-05 | 5.16E-11 | 0.026  | 3.66E-05 | 0.026  |
| 76  | 2.05E-05 | 4.31E-11 | 0.0242 | 2.97E-05 | 0.0242 |
| 78  | 1.67E-05 | 3.6E-11  | 0.0226 | 2.41E-05 | 0.0226 |
| 80  | 1.35E-05 | 3E-11    | 0.0211 | 1.96E-05 | 0.0211 |
| 82  | 0.000011 | 2.5E-11  | 0.0197 | 1.59E-05 | 0.0197 |
| 84  | 8.96E-06 | 2.08E-11 | 0.0183 | 1.29E-05 | 0.0184 |
| 86  | 7.28E-06 | 1.73E-11 | 0.0171 | 1.05E-05 | 0.0171 |
| 88  | 5.92E-06 | 1.44E-11 | 0.016  | 8.51E-06 | 0.016  |
| 90  | 4.82E-06 | 1.2E-11  | 0.0149 | 6.91E-06 | 0.0149 |
| 92  | 3.92E-06 | 9.97E-12 | 0.0139 | 5.62E-06 | 0.0139 |
| 94  | 3.19E-06 | 8.29E-12 | 0.013  | 4.56E-06 | 0.013  |
| 96  | 2.59E-06 | 6.88E-12 | 0.0121 | 3.71E-06 | 0.0121 |
| 98  | 2.11E-06 | 5.72E-12 | 0.0113 | 3.01E-06 | 0.0113 |
| 100 | 1.72E-06 | 4.75E-12 | 0.0105 | 2.45E-06 | 0.0105 |

|     |          |          |          |          |          |
|-----|----------|----------|----------|----------|----------|
| 102 | 1.4E-06  | 3.94E-12 | 0.00982  | 1.99E-06 | 0.00982  |
| 104 | 1.14E-06 | 3.27E-12 | 0.00916  | 1.62E-06 | 0.00916  |
| 106 | 9.25E-07 | 2.71E-12 | 0.00855  | 1.31E-06 | 0.00855  |
| 108 | 7.52E-07 | 2.24E-12 | 0.00798  | 1.07E-06 | 0.00798  |
| 110 | 6.11E-07 | 1.86E-12 | 0.00744  | 8.67E-07 | 0.00744  |
| 112 | 4.97E-07 | 1.54E-12 | 0.00694  | 7.03E-07 | 0.00694  |
| 114 | 4.03E-07 | 1.27E-12 | 0.00648  | 5.71E-07 | 0.00648  |
| 116 | 3.28E-07 | 1.05E-12 | 0.00604  | 4.64E-07 | 0.00604  |
| 118 | 2.67E-07 | 8.7E-13  | 0.00564  | 3.77E-07 | 0.00564  |
| 120 | 2.17E-07 | 7.2E-13  | 0.00526  | 3.06E-07 | 0.00526  |
| 125 | 1.29E-07 | 4.47E-13 | 0.00442  | 1.82E-07 | 0.00442  |
| 130 | 7.68E-08 | 2.76E-13 | 0.00372  | 1.08E-07 | 0.00372  |
| 135 | 4.57E-08 | 1.71E-13 | 0.00312  | 6.4E-08  | 0.00312  |
| 140 | 2.72E-08 | 1.06E-13 | 0.00263  | 3.8E-08  | 0.00263  |
| 145 | 1.62E-08 | 6.51E-14 | 0.00221  | 2.26E-08 | 0.00221  |
| 150 | 9.68E-09 | 4.02E-14 | 0.00186  | 1.35E-08 | 0.00186  |
| 155 | 5.77E-09 | 2.48E-14 | 0.00156  | 7.92E-09 | 0.00156  |
| 160 | 3.44E-09 | 1.53E-14 | 0.00131  | 4.77E-09 | 0.00131  |
| 165 | 2.05E-09 | 9.38E-15 | 0.0011   | 2.91E-09 | 0.0011   |
| 170 | 1.22E-09 | 5.76E-15 | 0.000927 | 1.69E-09 | 0.000927 |
| 175 | 7.3E-10  | 3.54E-15 | 0.00078  | 1.05E-09 | 0.00078  |
| 180 | 4.34E-10 | 2.17E-15 | 0.000655 | 5.82E-10 | 0.000655 |
| 185 | 2.6E-10  | 1.33E-15 | 0.000551 | 3.49E-10 | 0.000551 |
| 190 | 1.55E-10 | 8.14E-16 | 0.000463 | 2.33E-10 | 0.000463 |
| 195 | 9.23E-11 | 4.98E-16 | 0.000389 | 1.16E-10 | 0.000389 |
| 200 | 5.5E-11  | 3.05E-16 | 0.000327 | 8.73E-11 | 0.000327 |
| 205 | 3.28E-11 | 1.86E-16 | 0.000275 | 5.82E-11 | 0.000275 |
| 210 | 1.96E-11 | 1.14E-16 | 0.000231 | 2.91E-11 | 0.000231 |
| 215 | 1.17E-11 | 6.94E-17 | 0.000195 | 1.46E-11 | 0.000195 |
| 220 | 6.97E-12 | 4.24E-17 | 0.000164 | 1.46E-11 | 0.000164 |
| 230 | 2.48E-12 | 1.57E-17 | 0.000116 | 7.28E-12 | 0.000116 |
| 240 | 8.79E-13 | 5.84E-18 | 8.17E-05 | 0        | 8.17E-05 |
| 250 | 3.12E-13 | 2.16E-18 | 5.77E-05 | 0        | 5.77E-05 |

|     |          |          |          |   |          |
|-----|----------|----------|----------|---|----------|
| 300 | 1.52E-15 | 1.3E-20  | 1.02E-05 | 0 | 1.02E-05 |
| 350 | -1.5E-18 | 4.94E-24 | 1.79E-06 | 0 | 1.79E-06 |
